# Supplementary material
Source: PubMed Central journal article supplement (PMC3536098)
Supplement: AEM.02626-12_zam003133969so1.pdf [file AEM.02626-12_zam003133969so1.pdf]

FIG. S1. The different swab material used in the swabbing experiment (A): 1-6 represent Hi-Media (HM)-foam, HM-nylon, HM-polyester, HM-cotton, Johnsons bud and Tulips bud, respectively; (B) swab heads after swabbing operation showing the integrity

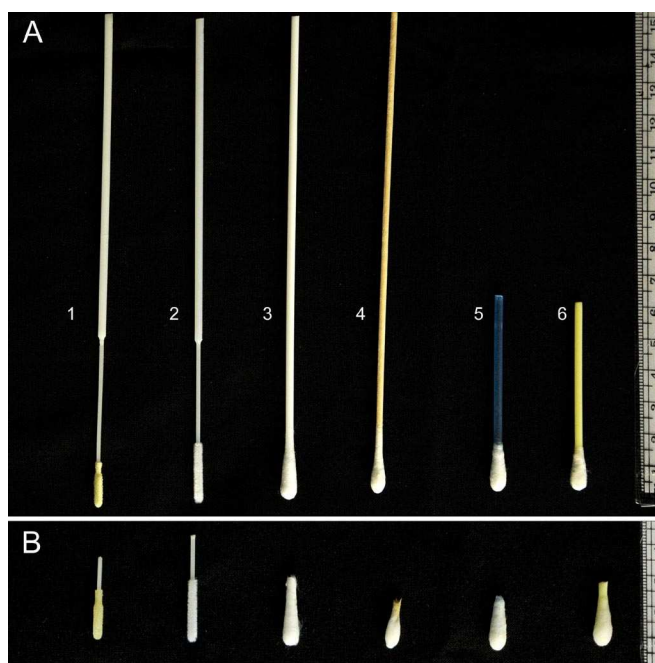

TABLE S1. Characterization of different swabs in terms of the net weight of the swab material and the water holding capacity, time taken for the inoculum recovery and the cost in relation to the recovery efficiency

| Type of swab  | Swab ranking as per % RE | Net wt of swab material (mg) | Quick-dip of swab            |                                | Saturation soaking of swab      |                                     | Time to saturation (s) | Time needed for swabbing†(s) | Cost / unit (INR) |
|---------------|--------------------------|------------------------------|------------------------------|--------------------------------|---------------------------------|-------------------------------------|------------------------|------------------------------|-------------------|
|               |                          |                              | Water absorption (mg / swab) | Hydrophilicity index (mg / mg) | Gross water holding (mg / swab) | Gross water holding index (mg / mg) |                        |                              |                   |
| HM- foam      | VI (22.8 %)              | 9.7 ± 0.72 <sup>b</sup>      | 16.4 ± 3.50 <sup>a</sup>     | 1.7 ± 0.38 <sup>a,b</sup>      | 21.2 ± 2.52 <sup>a</sup>        | 2.2 ± 0.21 <sup>a</sup>             | 40-60                  | 172.7 ± 38.3 <sup>b</sup>    | 35.0              |
| HM- nylon     | V (45.0 %)               | 3.8 ± 0.33 <sup>a</sup>      | 61.9 ± 6.08 <sup>b</sup>     | 16.6 ± 2.13 <sup>d</sup>       | 76.4 ± 8.89 <sup>b</sup>        | 20.4 ± 1.18 <sup>d</sup>            | 20-30                  | 211.7 ± 17.4 <sup>c</sup>    | 35.8              |
| HM- polyester | IV (50.2 %)              | 49.7 ± 4.22 <sup>c</sup>     | 103.2 ± 36.4 <sup>c</sup>    | 2.1 ± 0.58 <sup>b</sup>        | 158.5 ± 21.3 <sup>c</sup>       | 3.2 ± 0.23 <sup>a</sup>             | 20-40                  | 53.8 ± 7.60 <sup>a</sup>     | 13.6              |
| HM- cotton    | III (56.6 %)             | 22.5 ± 6.54 <sup>c</sup>     | 20.2 ± 5.95 <sup>a</sup>     | 0.9 ± 0.38 <sup>a</sup>        | 145.1 ± 19.0 <sup>c</sup>       | 7.0 ± 2.0 <sup>b</sup>              | 70-90                  | 53.3 ± 8.79 <sup>a</sup>     | 3.12              |
| Johnsons bud  | II (64.1 %)              | 29.2 ± 3.39 <sup>d</sup>     | 56.5 ± 18.60 <sup>b</sup>    | 2.1 ± 0.88 <sup>b</sup>        | 256.4 ± 12.8 <sup>e</sup>       | 8.9 ± 1.14 <sup>c</sup>             | 30-50                  | 36.3 ± 4.46 <sup>a</sup>     | 0.75              |
| Tulips bud    | I (70.6 %)               | 26.3 ± 3.34 <sup>d</sup>     | 128.5 ± 20.36 <sup>d</sup>   | 4.9 ± 0.67 <sup>c</sup>        | 222.1 ± 21.6 <sup>d</sup>       | 8.5 ± 0.81 <sup>c</sup>             | 20-30s                 | 40.8 ± 4.45 <sup>a</sup>     | 0.18              |
| P =           |                          | 2.85 × 10 <sup>-18</sup>     | 2.44 × 10 <sup>-11</sup>     | 4.74 × 10 <sup>-22</sup>       | 1.83 × 10 <sup>-21</sup>        | 2.90 × 10 <sup>-22</sup>            |                        | 2.7 × 10 <sup>-18</sup>      |                   |

†Based on the time taken for the drawing of the applied 100 µl PBST by the swab head from the sampling spots; six replications in all instances

INR, Indian National Rupee, Values followed by the same letter are not significantly different.

Hydrophilicity index = quick-dip water holding capacity (mg) ÷ net wt of swab (mg); Gross water holding-capacity index = saturation water holding (mg) ÷ net wt of swab (mg)

TABLE S2. Recovery of different organisms from the steel work bench of laminar airflow with the Tulips cotton bud swabbing

| Organism                      | Amount of 2.0 OD spore suspension used / spot <sup>§</sup> | CFU applied / spot ( $\times 10^6$ ) | CFU recovery per spot ( $\times 10^6$ ) | Recovery efficiency (%) |
|-------------------------------|------------------------------------------------------------|--------------------------------------|-----------------------------------------|-------------------------|
| <i>Bacillus pumilus</i>       | 12.5 $\mu$ l                                               | 11.4 $\pm$ 1.45                      | 8.0 $\pm$ 1.71                          | 70.2                    |
| <i>Bacillus cereus</i>        | 50 $\mu$ l                                                 | 10.3 $\pm$ 0.69                      | 7.9 $\pm$ 0.47                          | 76.6                    |
| <i>Bacillus thuringiensis</i> | 75 $\mu$ l                                                 | 12.4 $\pm$ 1.21                      | 9.4 $\pm$ 0.51                          | 76.4                    |
| <i>Brevibacillus</i> sp.      | 100 $\mu$ l                                                | 9.6 $\pm$ 0.75                       | 6.9 $\pm$ 0.93                          | 72.1                    |
| <i>Lysinibacillus</i> sp.     | 50 $\mu$ l                                                 | 10.9 $\pm$ 1.86                      | 7.8 $\pm$ 0.84                          | 71.3                    |
| <i>Paenibacillus</i> sp.      | 150 $\mu$ l                                                | 14.0 $\pm$ 0.66                      | 10.4 $\pm$ 2.12                         | 74.4                    |
| <i>B. subtilis</i> (control)  | 12 $\mu$ l                                                 | 10.1 $\pm$ 1.21                      | 7.6 $\pm$ 0.77                          | 71.5                    |

<sup>§</sup>Quantity used to obtain the estimated CFU of  $1 \times 10^7$  CFU per spot based on the preliminary CFU assessment of the stock; Variable amounts due to the differences in spore size and the consequent CFU ml<sup>-1</sup> for different organisms
